# Supplementary material for: Effects of the Interleukin-6 Receptor Blocker Sarilumab on Metabolic Activity and Differentiation Capacity of Primary Human Osteoblasts
Source: MDPI journal article supplement (doi:10.3390/pharmaceutics14071390), 2022-06-30
Supplement: s1 [file s1]

# Supplementary Materials: Effects of the Interleukin-6 Receptor Blocker Sarilumab on Metabolic Activity and Differentiation Capacity of Primary Human Osteoblasts

Annett Klinder, Janine Waletzko-Hellwig, Marie-Luise Sellin, Anika Seyfarth-Sehlke, Markus Wolfien, Franziska Prehn, Rainer Bader and Anika Jonitz-Heincke

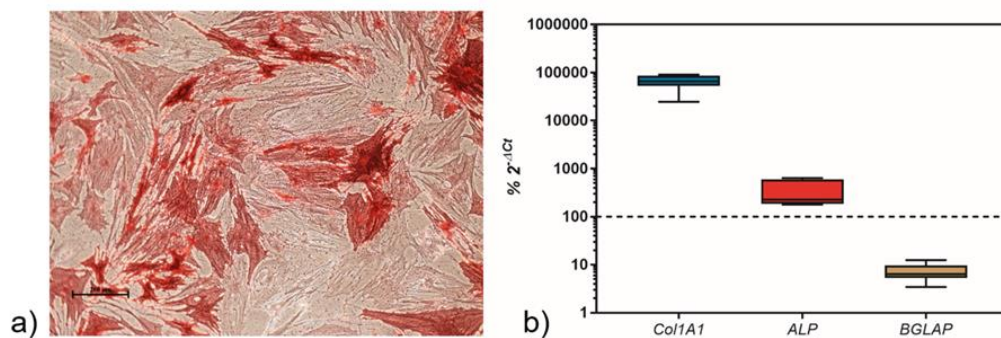

**Figure S1.** Differentiation capacity of human primary osteoblasts in passage 3. (a) Alkaline phosphatase stain of monolayer cells. Red cells are positive for alkaline phosphatase (bar: 200 μm). (b) Gene expression profile of Col1A1, ALP, and BGLAP in unstimulated osteoblasts. Results were calculated by  $2^{-\Delta C_t}$  method (% housekeeping gene HPRT). Data are presented as boxplots ( $n = 6$ ).

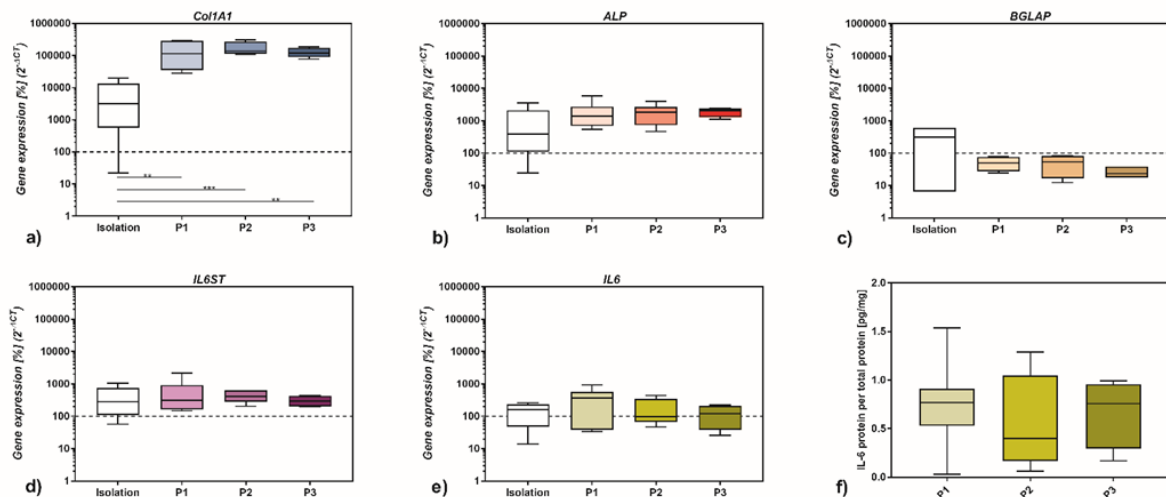

**Figure S2.** Course of gene (a–e) and protein expression (f) during in vitro cultivation of primary human osteoblasts from isolation up to passage (P) 3. Expression of genes related to the differentiation capacity of human primary osteoblasts—Col1A1 (a), ALP (b), and BGLAP (c)—as well as of genes related to IL-6 signaling—IL6ST (d) and IL6 (e)—were analyzed in osteoblasts directly after isolation and in passages 1, 2, and 3. Results were calculated by  $2^{-\Delta C_t}$  method (% housekeeping gene HPRT). Release of IL-6 protein (f) into cell culture supernatant was determined in passages 1, 2, and 3. IL-6 protein was normalized to total protein release. Data are presented as box plots ( $n = 3-6$ ). Statistical significance was determined via ANOVA with Bonferroni's post hoc test: \*\*  $p < 0.01$ ; \*\*\*  $p < 0.001$ .

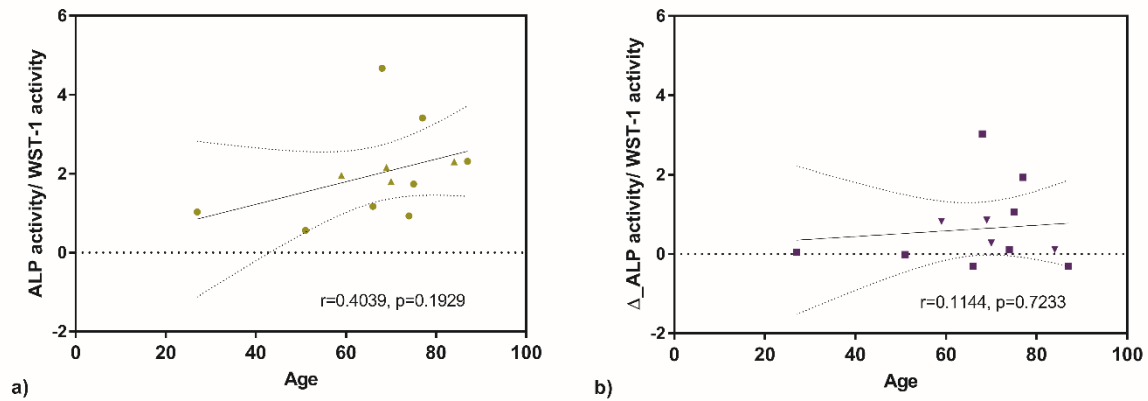

**Figure S3.** Correlation analysis of donor age to alkaline phosphatase (ALP) activity normalized to metabolic activity after exposure to IL-6 and sIL-6R (a) and to the difference ( $\Delta$ ) in ALP activity related to metabolic activity after incubation with and without sarilumab (b) for 72 h ( $n = 12$  independent donors in passage 3 (female:  $n = 8$ , male:  $n = 4$ ). All data are shown as single data points with linear regression and confidence intervals (95%). Female donors (green dot and purple square) and male donors (green up-facing triangle and purple down-facing triangle) were assigned separate symbols. Statistical analysis was performed with Pearson's correlation analysis. The correlation coefficient  $r$  and the  $p$ -value of the analyses are reported in the graphs.

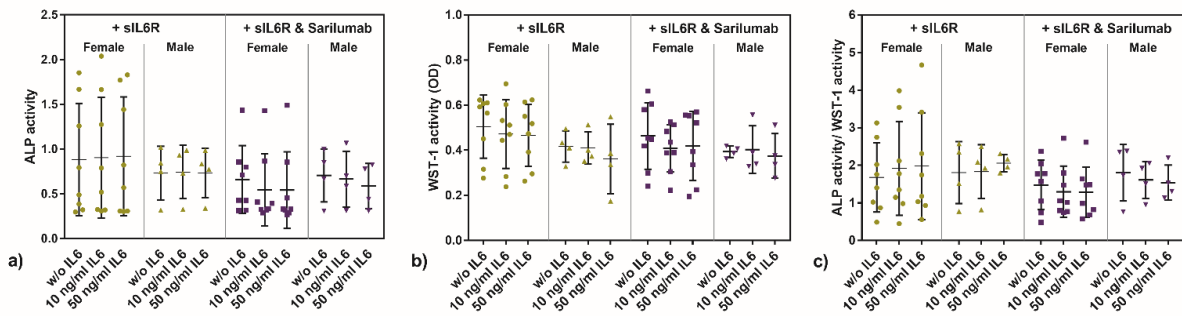

**Figure S4.** Comparison of female and male donors for osteoblastic viability and alkaline phosphatase (ALP) activity after exposure to IL-6, sIL-6R  $\pm$  sarilumab for 72 h ( $n = 8$  independent female donors and  $n = 4$  independent male donors, both in passage 3). (a) Alkaline phosphatase (ALP) activity of osteoblasts, which was quantified via hydrolysis of p-nitrophenyl phosphate. (b) Cell viability was tested via water-soluble tetrazolium salt (WST-1) assay. (c) ALP activity related to metabolic activity. All data are shown as single data points with mean  $\pm$  SD. Statistical significance was determined via repeated-measures two-way ANOVA with Bonferroni's post hoc test. There were no significant differences.

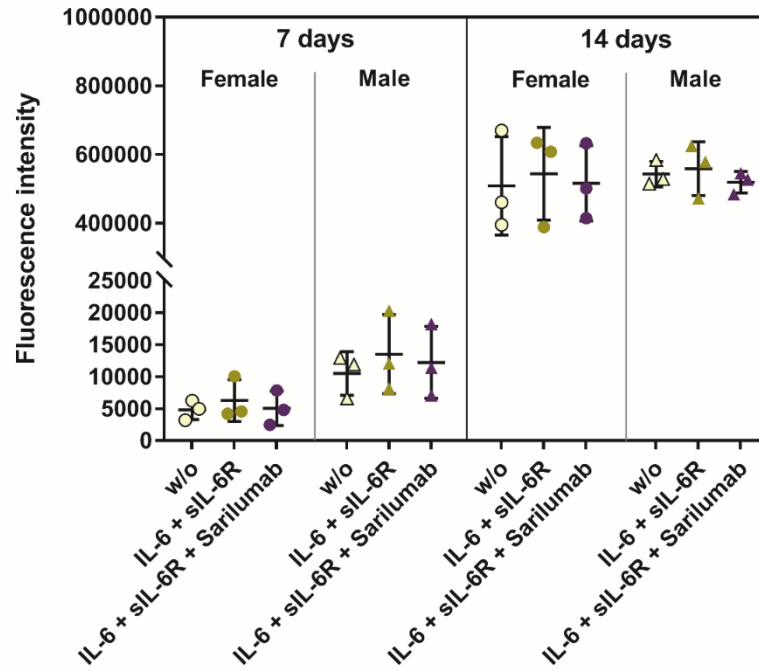

**Figure S5.** Comparison of female and male donors for mineralization capacity of osteoblasts after exposure to IL-6, sIL-6R  $\pm$  sarilumab ( $n = 3$  independent female donors [dots] and  $n = 3$  independent male donors [triangles]). Cells were stimulated with IL-6, sIL-6R  $\pm$  sarilumab over a period of 7 or 14 days in calcium-supplemented medium. Afterward, deposition of the hydroxyapatite portion of bone-like nodules was quantified via OsteoImage<sup>TM</sup>. Fluorescence signals of mineralization were detected at excitation/emission wavelengths of 492/520 nm using a microplate reader. All data are shown as single data points with mean  $\pm$  SD. Statistical significance was determined via repeated-measures two-way ANOVA with Bonferroni's post hoc test.
